# Supplementary material for: Empirical models for non-destructive evaluation of in-situ compressive strength of structural concrete with the objective of encompassing global uncertainty factors
Source: Research Square preprint supplement (doi:10.21203/rs.3.rs-4813626/v1), 2024-08-23
Supplement: Supplementary file 1 [file 296e42c73b1d2d2a96447000.docx]

## Table S1. Some existing correlations collected from literature

| **Sl. No** | **Authors** | **Compressive Strength-RN**  **(fc in MPa)** | **Compressive Strength-UPV**  **(fc in MPa; V in km/s unless noted)** | **Compressive Strength-SONREB**  **(fc in MPa)** | **Ref.** |
| --- | --- | --- | --- | --- | --- |
| 1 | Schmidt, 1950 | fc = -0.0003 RN 3 + 0.0399 RN 2 - 0.1525 RN + 3.9976 |  |  | (Katalin Szilágyi - Adorján Borosnyói 2009) |
| 2 | Chefdeville, 1953 | fc = 0.0477 RN 1.7796 |  |  | (Katalin Szilágyi - Adorján Borosnyói 2009) |
| 3 | Greene, 1954 | fc = 0.1134 RN 1.4927 |  |  | (Katalin Szilágyi - Adorján Borosnyói 2009) |
| 4 | Zoldners, 1957 | fc = 0.4594 RN 3 - 37.879 RN2 + 1175.7 RN – 10021 |  |  | (Katalin Szilágyi - Adorján Borosnyói 2009) |
| 5 | Kolek, 1958 | fc = 0.056 RN 2 - 0.022 RN + 1.57 |  |  | (Katalin Szilágyi - Adorján Borosnyói 2009) |
| 6 | Brunarski, 1963 | fc = 0.019 RN 2.59 |  |  | (Katalin Szilágyi - Adorján Borosnyói 2009) |
| **7** | Victor, 1963 | **fc = 10 RN – 50** |  |  | (Katalin Szilágyi - Adorján Borosnyói 2009) |
| 8 | Facaoaru, 1964 | fc = 0.06 RN 2.42 |  |  | (Katalin Szilágyi - Adorján Borosnyói 2009) |
| 9 | Gaede, Schmidt, 1964 | fc = 0.001 RN 3 + 0.1222 RN 2 - 2.9185 RN + 27.894 |  |  | (Katalin Szilágyi - Adorján Borosnyói 2009) |
| 10 | ÉMI, 1965 | fc = 0.515 RN2 - 19.951 RN + 258.06 |  |  | (Katalin Szilágyi - Adorján Borosnyói 2009) |
| 11 | Vadász, 1970 | fc = 0.53 RN² - 21 RN + 276 |  |  | (Katalin Szilágyi - Adorján Borosnyói 2009) |
| 12 | MSZ 4715, 1972 | fc = 0.0051 RN 2.3956 |  |  | (Katalin Szilágyi - Adorján Borosnyói 2009) |
| 13 | Bellander, 1979 |  |  | fc = - 32.7 + 0.00082 RN³ + 11.03 V | (Cristofaro et al. 2020) |
| **14** | Cianfrone, Facaoaru, 1979 | **fc = 2.0098 RN - 21.749** |  |  | (Katalin Szilágyi - Adorján Borosnyói 2009) |
| 15 | Meynink et al., 1979 |  |  | **fc = - 24.668 + 1.427 RN + 0.0294 V4** | (Erdal 2009) |
| 16 | Talabér et al., 1979 | lg [fc] = -1.055 + 1.805 [lg RN] + 0.345 [lg RN]2 |  |  | (Katalin Szilágyi - Adorján Borosnyói 2009) |
| 17 | Giaccheti, Lacquanite, 1980 |  |  | fc = 7.695 × 10^(-11) V2.6 RN1.4 | (Cristofaro et al. 2020) |
| 18 | Malhotra, Carette, 1980 | fc = 54.1 [ln RN] - 148.4 |  |  | (Katalin Szilágyi - Adorján Borosnyói 2009) |
| 19 | Borján, 1981 | lg [fc] = - 2.159 + 1.805 [lg RN] + 0.345 [lg RN] 2 |  |  | (Katalin Szilágyi - Adorján Borosnyói 2009) |
| 20 | Bocca, Cianfrone, 1983 |  |  | fc = 2.765 × 10(-9)  V2.487 RN1.3114 | (Cristofaro et al. 2020) |
| 21 | Di Leo et al., 1984 | fc = 0.00883 RN 2.27 |  |  | (Katalin Szilágyi - Adorján Borosnyói 2009) |
| **22** | Knaze, Beno, 1984 | **fc = - 0.00186 RN² + 2.0449 RN - 46.426** |  |  | (Katalin Szilágyi - Adorján Borosnyói 2009) |
| 23 | Samarin, Dhir, 1984 |  |  | fc = -12 + 0.1 V4 + 0.76 RN | (Cristofaro et al. 2020) |
| 24 | Tanigawa et al., 1984 |  |  | fc = 0.745 RN + 0.951V - 0.544 | (Tanigawa et al. 1984) |
| 25 | Postacioglu, 1985 |  |  | fc = [(RN/(3.64 + 0.023RN - 0.56V))2] × 0.0980665 | (Postacioglu 1985) |
| 26 | Sri Ravindrajah et al., 1988 | fc = 7.25 e 0.08 RN |  | fc = 0.67 e(0.72V+0.04RN) | (Sri Ravindrajah et al. 1988) |
| 27 | MI 15011, 1988 | ln [fc] = - 4.69 + 1.79 [ln RN] + 0.152 [ln RN] 2 |  |  | (Katalin Szilágyi - Adorján Borosnyói 2009) |
| **28** | Arioglu et al., 1991 |  |  | fc = (18.6 e(0.019RN + 0.515V )) × 0.0980665 | (Erdal 2009) |
| **29** | Gasparik 1992 |  |  | fc = 0.0286 RN 1.246 V 1.85 | (Cristofaro et al. 2020) |
| **30** | Mikulic et al., 1992 | **fc = 2.50 RN - 18. 4** |  |  | (Katalin Szilágyi - Adorján Borosnyói 2009) |
| 31 | Almeida, 1993 | fc = 1.0407 RN 1.155 |  |  | (Katalin Szilágyi - Adorján Borosnyói 2009) |
| **32** | Arioglu et al. 1994 |  |  | fc = (10 3.119 √LOG ( RN^3 V^4) - 5.89) × 0.0980665 | (Erdal 2009) |
| **33** | Di Leo, Pascale, 1994 |  |  | fc = 1.2 × 10(-9)  V2.446 RN1.058 | (Cristofaro et al. 2020) |
| **34** | Gonçalves, 1995 | **fc = 1.73 RN - 34.3** |  |  | (Katalin Szilágyi - Adorján Borosnyói 2009) |
| 35 | Arioglu et al., 1996 |  |  | fc = 0.00153 × (RN3 V4)0.611 | (Cristofaro et al. 2020) |
| 36 | Ramyar et al., 1996 |  |  | **fc = -39.57 + 1.532 RN + 5.0614 V** | (Cristofaro et al. 2020) |
| 37 | Kheder, 1999 | fc = 0.4030 RN 1.2083 | **fc = 1.2 × 10–5 × V 1.7447** | **fc = 0.0158 RN1.1171 (V × 1000)0.4254** | (Kheder 1999) |
| **38** | Soshiroda, 1999 | **fc = 1.47 RN - 16.85** |  |  | (Katalin Szilágyi - Adorján Borosnyói 2009) |
| 39 | Lima, Silva, 2000 | fc = 0.0501 RN1.8428 |  |  | (Katalin Szilágyi - Adorján Borosnyói 2009) |
| **40** | Nyim, 2000 | **fc = 2.2415 RN - 30.762** |  |  | (Katalin Szilágyi - Adorján Borosnyói 2009) |
| 41 | Pascale et al., 2000 | fc = 0.000135 RN3.4424 |  |  | (Katalin Szilágyi - Adorján Borosnyói 2009) |
| **42** | Qasrawi, 2000 | **fc = 1.353 RN – 17.393** | **fc = 36.72 V - 129.077** |  | (Katalin Szilágyi - Adorján Borosnyói 2009) |
| 43 | CPWD, 2002 | fc = 0.0244 RN1.9898 |  |  | (Katalin Szilágyi - Adorján Borosnyói 2009) |
| 44 | Beconchini, Formichi, 2003 |  |  | fc = 5.9 + 2.712 × 10(-15) RN . V4 | (Cristofaro et al. 2020) |
| 45 | Caiaro et al., 2003 |  |  | fc = 1.74 × 10(-7) RN(-0.0674) V2.36 | (Cristofaro et al. 2020) |
| 46 | Pascale et al., 2003 | fc = 0.0002392 RN3.299 |  |  | (Katalin Szilágyi - Adorján Borosnyói 2009) |
| 47 | Proceq SA, 2003 | fc = 0.0117 RN 2 + 0.8973 RN - 13.213 |  |  | (Katalin Szilágyi - Adorján Borosnyói 2009) |
| 48 | Del Monte et al., 2004 |  |  | fc = 4.40 × 10(-7) (RN2 V3)0.5634 | (Cristofaro et al. 2020) |
| 49 | Demirboga et al., 2004 |  | **fc = 0.008 e0.002V (m/s)** |  | (Alwash 2017) |
| 50 | Menditto et al., 2004 |  |  | fc = 0.00004 RN1.88148 V0.80840 | (Cristofaro et al. 2020) |
| 51 | Nehme, 2004 | fc = 0.0005 RN 3 |  |  | (Katalin Szilágyi - Adorján Borosnyói 2009) |
| fc = 2.68 e 0.06 RN |  |  |
| 52 | Fabbrocino et al., 2005 | fc = 0.00752 RN 2.359 |  |  | (Katalin Szilágyi - Adorján Borosnyói 2009) |
| **53** | Nash’t et al., 2005 | **fc = 0.788 RN 1.03** |  |  | (Katalin Szilágyi - Adorján Borosnyói 2009) |
| 54 | Pucinotti, 2005 | fc = 3.9622 e (0.0504 RN) | **fc = 2.4518 e0.0006 V (m/s)** |  | (Pucinotti and Lorenzo 2005) |
| **55** | Hobbs et al., 2006 | **fc = 2.1683 RN - 27.747** |  |  | (Katalin Szilágyi - Adorján Borosnyói 2009) |
| **56** | Soshiroda et al., 2006 | **fc = 1.623 RN - 20.547** |  | **fc = 1.416 RN + 8.63 V - 51.581** | (Soshiroda et al. 2006) |
| **57** | Proceq, 2007 | **fc = 1.398 RN - 20.17** |  |  | (Breysse 2012b) |
| 58 | D’ Ambrisi et al., 2008 | fc = 5.1698 e(0.0341*RN) |  |  | (D’Ambrisi et al. 2008) |
| 59 | S. Biondi, E. Candigliota, 2008 | fc = 0.009167 RN 2.27 |  |  | (Biondi and Candigliota 2008) |
| 60 | Domingo et al., 2009 |  |  | **Log(fc) = 1.056 log RN + 1.633 log (V×10³) - 6.097** | (Domingo and Hirose 2009) |
| 61 | Erdal Mursel, 2009 | fc = − 0.0177 RN² + 2.0481 RN −19.303 |  | **fc = 0.42 RN + 13.166 V - 40.255** | (Erdal 2009) |
| **62** | Faella et al., 2009 |  |  | **fc = 2.6199 × 10(-8) RN0.5341 V2.2878** | (Cristofaro et al. 2020) |
|  |  | **fc = 0.26511 RN + 0.01385 (V × 103) - 34.51583** |
| **63** | Machado et al., 2009 |  |  | fc = e(0.446V+0.048RN) | (Alwash 2017) |
| **64** | Monteiro et al., 2009 | **fc = 1.14 RN - 21.8 (A1L)** |  |  | (Monteiro and Gonçalves 2009) |
| fc = 6.45 (10-3) RN 2.23 (A1P) |  |  |
| **fc = 1.73 RN – 47 (A2)** |  |  |
| 65 | Szilágyi & Borosnyói, 2009 | fc = 0.0003 RN 3+ 0.0399 RN 2 - 0.1525 RN + 3.9976 |  |  | (Katalin Szilágyi - Adorján Borosnyói 2009) |
| 66 | Nucera , Pucinotti, 2010 | fc = 0.007 RN 2.012 | **fc = 0.276 e 0.001V (m/s)** | fc = 1.2 × 10(-9)  RN(-0.187)  (V × 103)2.893 | (Nucera and Pucinotti 2010) |
| 67 | Rojas-Henao et al., 2012 |  | **fc = 0.038 V 4.85** |  | (Rojas-Henao et al. 2012) |
| 68 | Al-Ameeri, et al. 2013 |  |  | fc = 0.42 RN0.63 e 0.58V | (Al-ameeri, Abbas S, Karrar, Al- Hussain, Essa 2013) |
| 69 | Brozovsky et al., 2013 | fc = 0.0946 RN 1.6484 [Hammer type: N] |  |  | (Büyüköztürk et al. 2012) |
| fc = 0.1139 RN 1.6145 [Hammer type: L] |  |  |
| 70 | Fiore, et al., 2013 |  |  | fc = 7.695 × 10(-11) V2.6 RN1.4 | (Fiore et al. 2013) |
| 71 | Mulik Nikhil et al. 2015 |  |  | fc = 1.64111 × 10(-9) V2.293662304  RN1.30768373 | (V et al. 2015) |
| 72 | Pucinotti 2015 |  | **fc = 0.184 e 0.0011 V (m/s)** | fc = 9.61 e(-14) RN3.55 V0.9 | (Pucinotti 2015) |
| 73 | K. Amini et al., 2016 | fc = - 0.0183 RN 2 + 1.8911 RN – 14.601 | **fc = 5.704 V² - 11.468 V – 16.213** |  | (Amini et al. 2016) |
| fc = 0.0501 RN 1.8565 | **fc = 0.0002 V 8.7879** |  |
| fc = 2.3895 e (0.0814 RN) | **fc = 0.0022 e 2.4278 V** |  |
| **74** | Ali-Benyahia et al., 2017 | **fc = –15.034 + 0.9874 RN** | **fc = –27.106 + 12.509 V** | **fc = -24.674 + 0.653 RN + 5.752 V** | (Ali-Benyahia et al. 2017) |
| fc = 0.0238 RN1.8781 | **fc = 0.6401 V2.5654** | **fc = 0.0543 RN1.171 V1.286** |
| fc = 2.6113 e (0.0558RN) | **fc = 1.2288 e 0.726 V** | fc =1.3947 e(0.034RN) e(0.374V) |

## Table S2. R² / “Root-Mean-Square-Error (RMSE)” values of existing correlations:

| **Author** | **Relationship** | | | | | |
| --- | --- | --- | --- | --- | --- | --- |
| Strength - RN | | Strength - UPV | | Strength - SonReb | |
| R² | RMSE | R² | RMSE | R² | RMSE |
| Knaze & Beno (1984) | 0.536 |  |  |  |  |  |
| Gonçalves (1995) | 0.860 |  |  |  |  |  |
| Kheder (1999) |  |  |  | 6.097 |  | 2.138 |
| Qasrawi (2000) |  | 2.815 |  | 3.698 |  |  |
| Demirboga et al. (2004) |  |  | 0.960 |  |  |  |
| Nash’t et al (2005) | 0.770 |  |  |  |  |  |
| Pucinotti et al. (2005) | 0.903 |  | 0.863 |  |  |  |
| Soshiroda et al. (2006) | 0.931 |  |  |  | 0.935 |  |
| Hobbs et al. (2006) | 0.925 |  |  |  |  |  |
| Monteiro, AIL (2009) | 0.697 |  |  |  |  |  |
| Mursel Erdal (2009) |  |  |  |  |  | 1.657 |
| Nucera et al. (2010) | 0.240 |  | 0.631 |  |  |  |
| Ali-Benyahia et al., Linear (2017), mean | 0.777 |  | 0.713 |  | 0.836 |  |

## 
